# Supplementary material
Source: HighWire-hosted journal article supplement (https://erj.ersjournals.com/highwire/filestream/114641/field_highwire_adjunct_files/0/ERJ-02289-2014_supplementary_tables.pdf)
Supplement: ERJ-02289-2014_supplementary_tables.pdf [file ERJ-02289-2014_supplementary_tables.pdf]

## **Effects of quitting cannabis smoking on respiratory symptoms**

Robert J Hancox, Hayden Shin, Andrew R Gray, Richie Poulton, Malcolm R Sears.

Online tables

Table S1. Association between frequent cannabis use and current tobacco smoking. P values from chi-squared tests.

|               | <b>Age</b> |           |           |           |           |
|---------------|------------|-----------|-----------|-----------|-----------|
|               | <b>18</b>  | <b>21</b> | <b>26</b> | <b>32</b> | <b>38</b> |
| Non-smoker    | 568        | 553       | 564       | 591       | 665       |
| Cannabis user | 12         | 44        | 51        | 35        | 31        |
| Tobacco user  | 225        | 236       | 239       | 239       | 183       |
| Both          | 57         | 108       | 111       | 103       | 68        |
| Total         | 862        | 941       | 965       | 968       | 947       |
|               |            |           |           |           |           |
| p             | <0.001     | <0.001    | <0.001    | <0.001    | <0.001    |

Table S2. Associations between current cannabis use and respiratory symptoms across multiple assessments using generalised estimating equations in non-smokers and smokers of tobacco.

a. Analyses exclude current tobacco smokers and are adjusted for sex, age of assessment, and asthma at that age. Odds Ratios represent the odds associated with current frequent cannabis use compared to compared to non or infrequent use.

|          | Participants | Mean observations/participant | Odds Ratio (95% CI) | p     |
|----------|--------------|-------------------------------|---------------------|-------|
| Cough    | 814          | 3.8                           | 1.98 (1.21, 3.26)   | 0.007 |
| Sputum   | 814          | 3.8                           | 2.18 (1.38, 3.45)   | 0.001 |
| Wheeze   | 811          | 3.8                           | 1.48 (0.97, 2.25)   | 0.071 |
| Dyspnoea | 814          | 3.8                           | 1.55 (0.99, 2.41)   | 0.054 |

b. Analyses restricted to current tobacco smokers and are adjusted for sex, age of assessment, and asthma at that age. Odds Ratios represent the odds associated with current frequent cannabis use compared to compared to non or infrequent use.

|          | Participants | Mean observations/participant | Odds Ratio (95% CI) | p      |
|----------|--------------|-------------------------------|---------------------|--------|
| Cough    | 469          | 3.3                           | 2.01 (1.55, 2.62)   | <0.001 |
| Sputum   | 469          | 3.3                           | 2.40 (1.83, 3.45)   | <0.001 |
| Wheeze   | 469          | 3.3                           | 1.57 (1.20, 2.05)   | <0.001 |
| Dyspnoea | 469          | 3.3                           | 1.14 (0.87, 1.50)   | 0.331  |

Table S3. Associations between current cannabis use and respiratory symptoms across multiple assessments using generalised estimating equations.

Analyses are adjusted for BMI, sex, age of assessment, and tobacco use and asthma at that age. Pregnant women are excluded. Odds Ratios represent the odds associated with current frequent cannabis use compared to compared to non or infrequent use.

|          | Participants | Mean observations/participant | Odds Ratio (95% CI) | p      |
|----------|--------------|-------------------------------|---------------------|--------|
| Cough    | 996          | 4.6                           | 2.02 (1.60, 2.55)   | <0.001 |
| Sputum   | 996          | 4.6                           | 2.38 (1.88, 3.00)   | <0.001 |
| Wheeze   | 995          | 4.6                           | 1.60 (1.27, 2.01)   | <0.001 |
| Dyspnoea | 996          | 4.6                           | 1.27 (1.00, 1.62)   | 0.053  |

Table S4. Associations between changes in cannabis use between assessments and respiratory symptoms across multiple assessments using generalised estimating equations in non-smokers of tobacco.

a. Analyses exclude current tobacco smokers and are adjusted for asthma at that age, sex, and age of assessment. Odds Ratios represent the odds associated with changes in cannabis use compared to the reference (non-user) category.

|          | Participants | Mean observations/participant | Group      | Odds Ratio (95% CI) | p     |
|----------|--------------|-------------------------------|------------|---------------------|-------|
| Cough    | 775          | 3.2                           | Non-user   | ref                 | 0.020 |
|          |              |                               | Quitter    | 0.93 (0.39, 2.24)   |       |
|          |              |                               | Starter    | 1.35 (0.61, 2.96)   |       |
|          |              |                               | Continuing | 2.76 (1.45, 5.27)   |       |
| Sputum   | 775          | 3.2                           | Non-user   | ref                 | 0.005 |
|          |              |                               | Quitter    | 0.99 (0.44, 2.26)   |       |
|          |              |                               | Starter    | 2.24 (1.21, 4.16)   |       |
|          |              |                               | Continuing | 2.55 (1.35, 4.81)   |       |
| Wheeze   | 774          | 3.2                           | Non-user   | ref                 | 0.476 |
|          |              |                               | Quitter    | 0.96 (0.50, 1.84)   |       |
|          |              |                               | Starter    | 1.25 (0.68, 2.32)   |       |
|          |              |                               | Continuing | 1.57 (0.85, 2.90)   |       |
| Dyspnoea | 775          | 3.2                           | Non-user   | ref                 | 0.304 |
|          |              |                               | Quitter    | 1.12 (0.58, 2.17)   |       |
|          |              |                               | Starter    | 1.07 (0.53, 2.17)   |       |
|          |              |                               | Continuing | 1.83 (0.98, 3.43)   |       |

b. Analyses restricted to current tobacco smokers and are adjusted for asthma at that age, sex, and age of assessment. Odds Ratios represent the odds associated with changes in cannabis use compared to the reference (non-user) category.

|          | Participants | Mean observations/participant | Group      | Odds Ratio (95% CI) | p      |
|----------|--------------|-------------------------------|------------|---------------------|--------|
| Cough    | 441          | 2.8                           | Non-user   | ref                 | <0.001 |
|          |              |                               | Quitter    | 1.25 (0.79, 1.97)   |        |
|          |              |                               | Starter    | 1.63 (1.07, 2.50)   |        |
|          |              |                               | Continuing | 2.98 (2.11, 4.23)   |        |
| Sputum   | 441          | 2.8                           | Non-user   | ref                 | <0.001 |
|          |              |                               | Quitter    | 0.82 (0.48, 1.39)   |        |
|          |              |                               | Starter    | 1.84 (1.19, 2.77)   |        |
|          |              |                               | Continuing | 3.04 (2.12, 4.35)   |        |
| Wheeze   | 441          | 2.8                           | Non-user   | ref                 | 0.013  |
|          |              |                               | Quitter    | 1.40 (0.87, 2.24)   |        |
|          |              |                               | Starter    | 1.35 (0.88, 2.09)   |        |
|          |              |                               | Continuing | 1.80 (1.26, 2.57)   |        |
| Dyspnoea | 441          | 2.8                           | Non-user   | ref                 | 0.502  |
|          |              |                               | Quitter    | 1.17 (0.73, 1.89)   |        |
|          |              |                               | Starter    | 1.31 (0.85, 2.02)   |        |
|          |              |                               | Continuing | 1.26 (0.87, 1.82)   |        |
